# Supplementary material for: Morphology and carrier non-geminate recombination dynamics regulated by solvent additive in polymer/fullerene solar cells
Source: Royal Society of Chemistry journal article supplement (doi:10.1039/d0ra03389h), 2020-01-01
Supplement: d0ra03389h1.pdf [file d0ra03389h1.pdf]

## Supplementary data

### Morphology and Carrier Non-Geminate Recombination Dynamics

#### Regulated by solvent additive in Polymer/Fullerene Solar Cells

Ming-Ming Huo<sup>(a)</sup>, Rong Hu<sup>(b),\*</sup>, Qing-Shan Zhang<sup>(b)</sup>, Shaoting Chen<sup>(a)</sup>, Xing Gao<sup>(b)</sup>, Yi Zhang<sup>(b)</sup>, Wei Yan<sup>(a)</sup>, Yong Wang<sup>(a)</sup>

*(a) Laser Institute, Qilu University of Technology (Shandong Academy of Sciences),  
Qingdao, Shandong 266100, China.*

*(b) Research Institute for New Materials Technology, Chongqing University of arts and  
sciences, Chongqing 402160, China*

#### **1. The small perturbation charge carrier lifetime ( $\tau_{\Delta n}$ ) as a function of charge carrier density ( $n$ ) for PBDTTT-E:PC<sub>71</sub>BM with and without DIO treated. The solid line is from the fitting curves of Figures 4(a) and 4(b) in manuscript.**

According to Figure 4(a) and 4(b) in manuscript, the power-law ( $\tau_{\Delta n}=a \cdot n^{-\lambda}$ ,  $a$  is a constant) relationship between small perturbation carrier lifetime ( $\tau_{\Delta n}$ ) versus the carrier concentration ( $n$ ) have been shown in Figure S1. Too few data points may cause larger deviation, so the solid line can be fitted, for device without DIO is  $\tau_{\Delta n}=4.3148 \times 10^{24} \cdot n^{-1.7688}$ , for device with DIO treated is  $\tau_{\Delta n}=2.8097 \times 10^{43} \cdot n^{-2.6390}$ . The power ( $\lambda$ ) is 1.7688 and 2.6390 for the device without and with DIO treated, respectively.

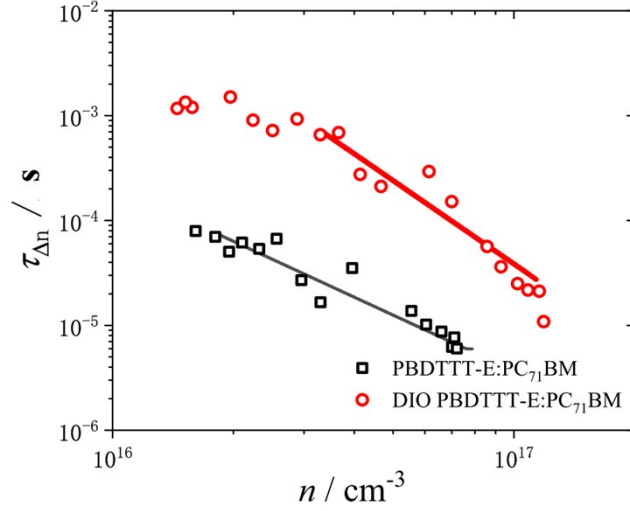

Figure S1: The small perturbation charge carrier lifetime ( $\tau_{\Delta n}$ ) as a function of charge carrier density ( $n$ ) for PBDTTT-E:PC<sub>71</sub>BM with (o red circle) and without (□ black square) DIO treated. The solid line is from the fitting curves of Figures 4(a) and 4(b) in manuscript.

## 2. The langevin reduction factor ( $\zeta$ )

The Langevin reduction factor ( $\zeta$ ) can be determined by equation S1<sup>[S1]</sup>:

$$\zeta = \frac{k_{rec}}{k_L} \quad (S1)$$

Where  $k_{rec}$  is the non-geminate recombination coefficient,  $k_L$  is the upper limit of the recombination coefficient, described by the langevin model (equation S2):

$$k_L = \frac{e}{\varepsilon \varepsilon_0} (\mu_e + \mu_h) \quad (S2)$$

Where  $e$  is the elementary charge constant,  $\varepsilon$  is the relative permittivity of the material, and  $\varepsilon_0$  is the vacuum permittivity constant. So, the  $k_L$  of PBDTTT-E:PC<sub>71</sub>BM with DIO treated is  $7.61 \times 10^{-10} \text{ cm}^3\text{s}^{-1}$ . The  $k_L$  of device without DIO is  $6.17 \times 10^{-10} \text{ cm}^3\text{s}^{-1}$ .

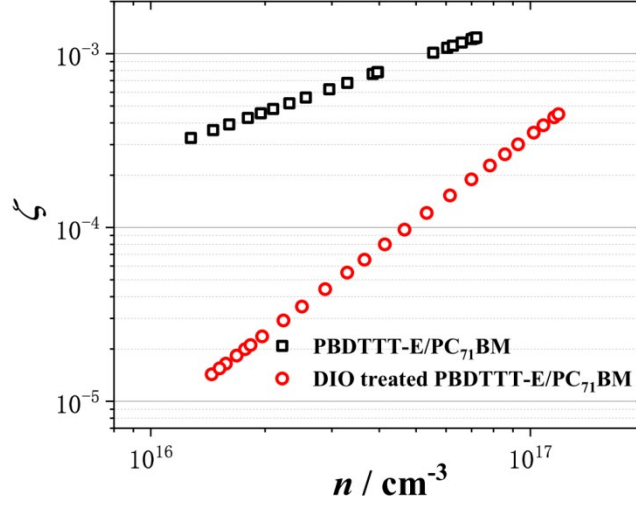

Figure S2: The langevin reduction factor ( $\zeta$ ) as a function of the charge carrier density ( $n$ ). the black  $\square$  and red  $\circ$  represent the PBDTTT-E:PC<sub>71</sub>BM without and with DIO treated devices, respectively.

### 3. Extracted mobility of the hole and electron-only devices

Based on Figure 2, we choose the current density when  $V-V_{bi}$  near 4V as  $J_{SCL}$ , which is used to calculate the SCLC mobility. The method has been used and published in other groups<sup>[S2,S3]</sup>.

Table S1. Extracted mobility of the hole and electron-only devices

| Active layer                     | Hole Mobility<br>(cm <sup>2</sup> V <sup>-1</sup> S <sup>-1</sup> ) | Electron Mobility<br>(cm <sup>2</sup> V <sup>-1</sup> S <sup>-1</sup> ) |
|----------------------------------|---------------------------------------------------------------------|-------------------------------------------------------------------------|
| PBDTTT-E:PC <sub>71</sub> BM     | $5.818 \times 10^{-4}$                                              | $4.425 \times 10^{-4}$                                                  |
| DIO PBDTTT-E:PC <sub>71</sub> BM | $4.910 \times 10^{-4}$                                              | $7.723 \times 10^{-4}$                                                  |

In addition, we combined the Mott-Gurney equation and Frenkel effect [S4]:

$$J = \frac{9}{8} \varepsilon_0 \varepsilon_r \mu_0 \frac{(V - V_{bi})^2}{d^3} \exp(\beta_F \sqrt{\frac{V - V_{bi}}{d}}) \quad (1)$$

Here  $E = \frac{V - V_{bi}}{d}$ , We can get

$$J = \frac{9}{8} \varepsilon_0 \varepsilon_r \mu_0 \frac{E^2}{d} \exp(\beta_F \sqrt{E}) \quad (2)$$

The  $\mu_0$  is the zero field mobility,  $E$  is electric field,  $\beta_F$  is the field dependent parameter.

Take the natural logarithm on both sides of the equation (2):

$$\ln\left(\frac{J}{E^2}\right) = \ln\left(\frac{9}{8} \varepsilon_0 \varepsilon_r \frac{\mu_0}{d}\right) + \beta_F \sqrt{E} \quad (3)$$

There is a linear relationship between  $\ln(J/E^2)$  and  $E^{1/2}$

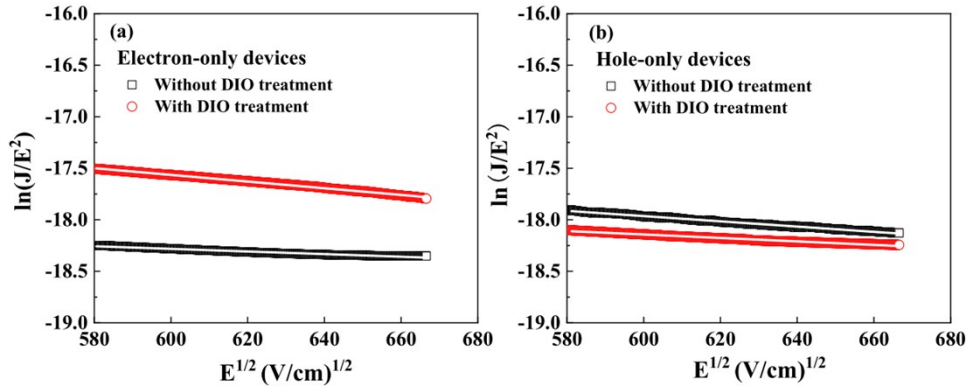

Figure S3:  $\ln(J/E^2)$  as a function of high  $E^{1/2}$  of electron-only devices (a) and hole-only devices (b) with (red○) and without DIO treatment (black □). The white lines are the linear fit lines followed equation (3).

The parameters extracted from the fit for the devices are summarized in Table S2, the negative Pool–Frenkel coefficient is consistent with P3HT:PCBM system.[S4]

Table S2. Parameters Extracted by the Fit for Devices

| Active layer          |             | $\mu_0$                                     | $\beta_F$                            |
|-----------------------|-------------|---------------------------------------------|--------------------------------------|
|                       |             | ( $\text{cm}^2\text{V}^{-1}\text{S}^{-1}$ ) | ( $\text{cmV}^{-1}$ ) <sup>1/2</sup> |
| Electron-only devices | Without DIO | $7.40 \times 10^{-4}$                       | -0.00128                             |
|                       | With DIO    | $4.91 \times 10^{-3}$                       | -0.00324                             |
| Hole-only devices     | Without DIO | $2.18 \times 10^{-3}$                       | -0.00254                             |
|                       | With DIO    | $1.09 \times 10^{-3}$                       | -0.00168                             |

According to Poole-Frenkel formula:

$$\mu(E) = \mu_0 \exp(\beta_F \sqrt{E}) \quad (4)$$

We can get the mobility( $\mu$ ) as a function of applied electric field ( $E$ ):

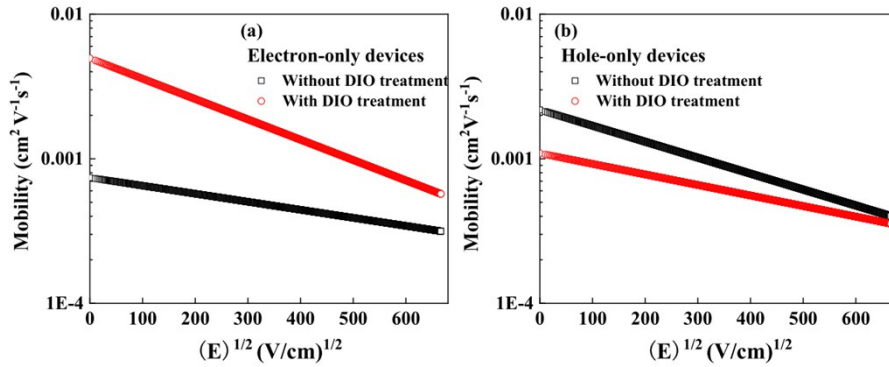

Figure S4:  $\mu(E)$  as a function of  $E^{1/2}$  of electron-only devices (a) and hole-only devices (b) with (red○) and without DIO treatment (black □).

[S1] M. C. Heiber, T. Okubo, S.-J. Ko, B. R. Luginbuhl, N. A. Ran, M. Wang, H. Wang, M. A. Uddin, H. Y. Woo, G. C. Bazan and T.-Q. Nguyen, *Energy Environ. Sci.*, 2018, **11**, 3019.

[S2] Y.-F. Zheng, S.-G. Li, D. Zheng, J.-S. Yu, *Organic Electronics*, 2014, **15**, 2647-2653.

[S3] Q.-C. Shang, J.-S. Yu, R. Hu, Z.-X. Liu, J. Cheng, Y. Li, X.-X. Shai, M.-M. Huo, X. Yang and L. Li, *ACS Appl. Mater. Interfaces*, 2020, **12**, 13051–13060.

[S4] N. Chandrasekaran, E. Gann, N. Jain, A. Kumar, S. Gopinathan, A. Sadhanala, R. H. Friend, A. Kumar, C. R. McNeill and D. Kabra, *ACS Applied Materials & Interfaces*, 2016, **8**, 20243–20250.
